# Supplementary material for: Nitrification regulates the responses of soil nitrous oxide emissions to nitrogen addition in China: a meta-analysis from a gene perspective
Source: Royal Society of Chemistry journal article supplement (doi:10.1039/d5em00057b), 2025-01-01
Supplement: d5em00057b1.pdf [file d5em00057b1.pdf]

**Nitrification regulates the responses of soil nitrous oxide emissions to nitrogen  
addition in China: a meta-analysis from a gene perspective**

Zetao Dai, Yanglong Zhang, Yujie Li, Tao Xiang, Feifei Wang, Jiarui Peng,

Shengchang Yang, Wenzhi Cao\*

Key Laboratory of the Ministry of Education for Coastal and Wetland Ecosystems, College of the  
Environment and Ecology, Xiamen University, Xiamen, Fujian, 361102, China

\* Corresponding authors at: Key Laboratory of the Ministry of Education for Coastal and Wetland  
Ecosystems, College of Environment and Ecology, Xiamen University, Xiamen, Fujian, 361102,  
China

E-mail addresses: wzcao@xmu.edu.cn (W. Cao).

## ***Supplementary Materials***

### ***Nitrogen addition protocols of unpublished data***

Sediments were collected from *Shacheng Bay* (27°17'N, 120°18'E), *Quanzhou Bay* (24°57'N, 118°41'E), and *Zhangjiang Estuary* (23°54'N, 117°26'E) in Fujian Province, China and transported to laboratory at 4°C. Incubation slurries were made by mixing sediments with artificial seawater at a ratio of 1:2. Next, the slurry was divided into four treatments and each was incubated under a different nitrogen (N) input rates (i.e., 0, 50, 150, and 320 kg N ha<sup>-1</sup> year<sup>-1</sup>) for 42 days. After that, slurry was used for denitrification rate measurement and soil property determination. Particularly, denitrification rates were measured by isotopic partitioning technique according to our previous work.<sup>1</sup>

## Supplementary Figures

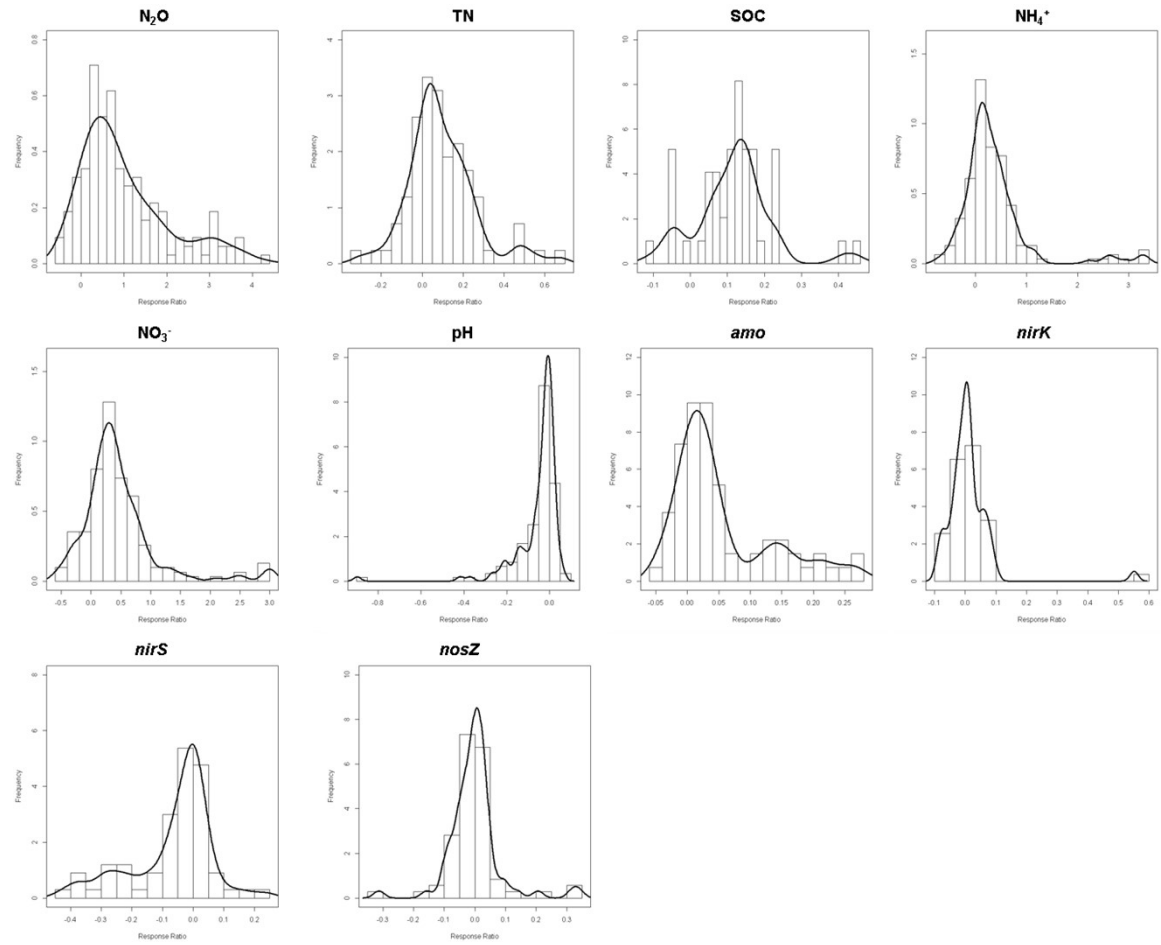

**Figure S1** The frequency distributions of the response ratio (lnRR) for N<sub>2</sub>O, TN, SOC, NH<sub>4</sub><sup>+</sup>, NO<sub>3</sub><sup>-</sup>, pH, *amo*, *nirK*, *nirS*, and *nosZ* responses to N addition. The solid curve is a Gaussian distribution fitted to the frequency data. The x-axis is the response ratio and the y-axis is frequency.

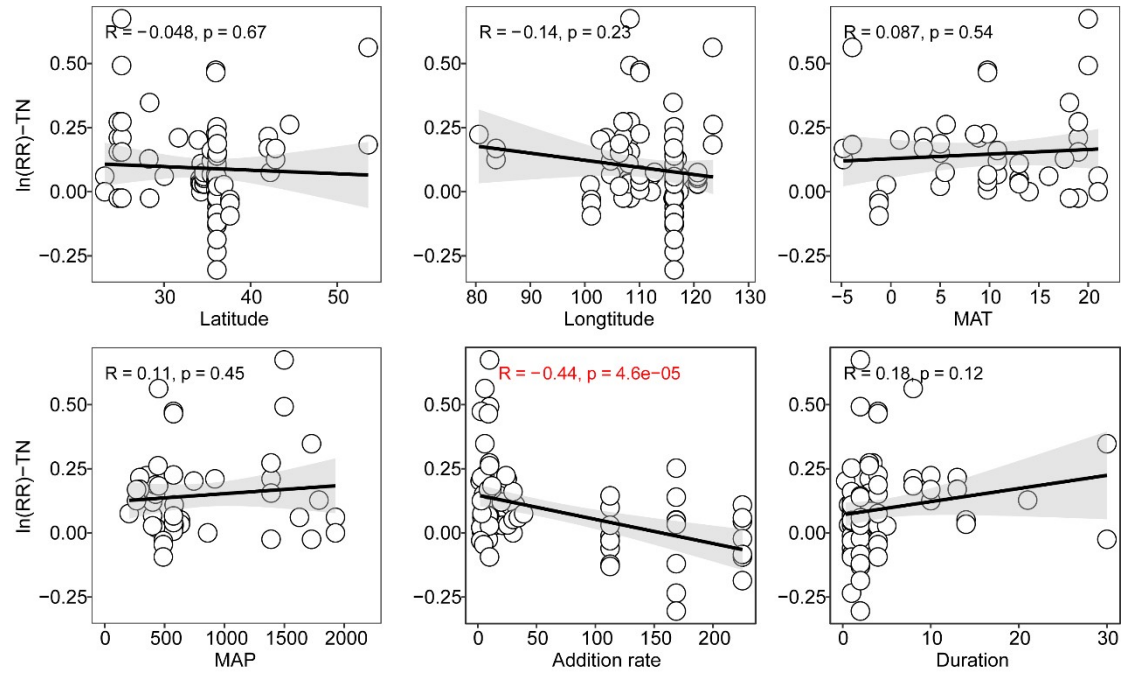

**Figure S2** Meta-regression for TN.  $\ln RR$  means response ratio.

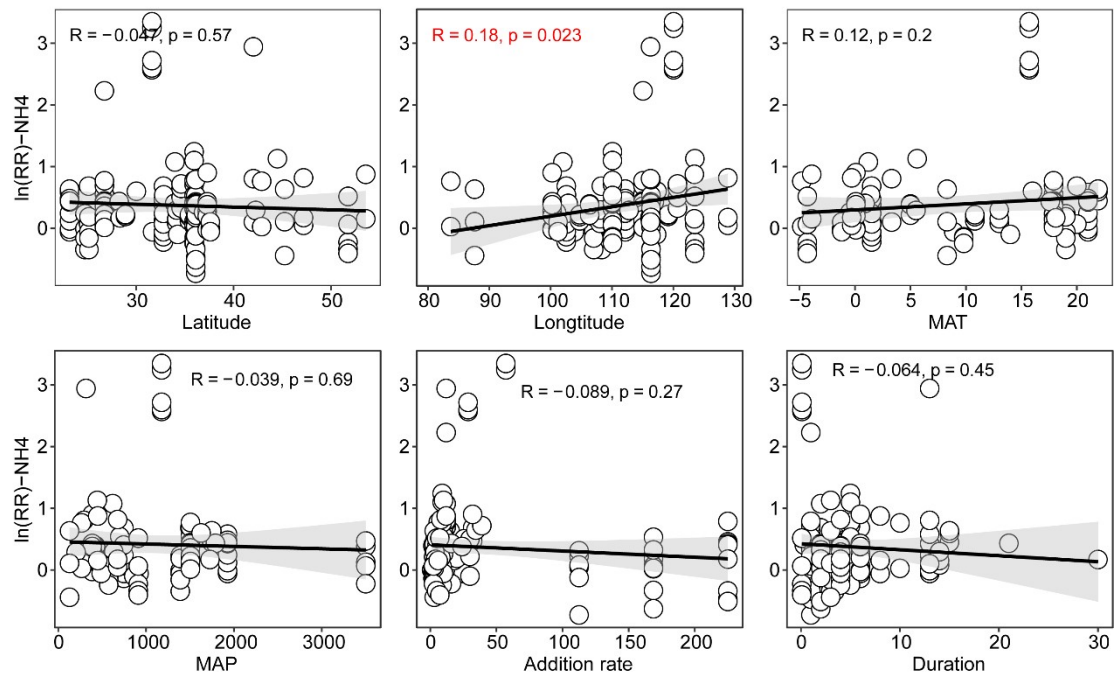

**Figure S3** Meta-regression for  $NH_4^+$ .  $\ln RR$  means response ratio.

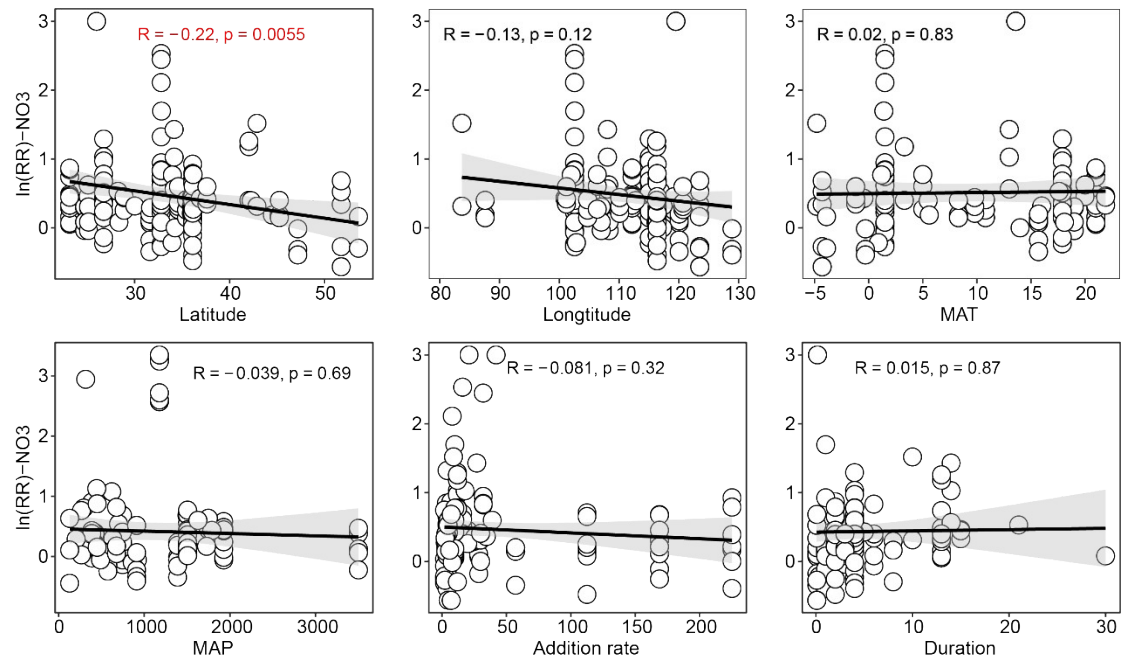

**Figure S4** Meta-regression for  $NO_3^-$ .  $\ln RR$  means response ratio.

#### Reference

1. N. Zhang, R. Guo, F. Wang, Z. Dai, Y. Li and W. Cao, Warming Tends to Promote Nitrogen Conservation but Stimulate  $N_2O$  Emissions in Mangrove Sediments, *Ecosystems*, 2023, **27**, 235-249.
